# Supplementary material for: Requirement of CRTC1 coactivator for hepatitis B virus transcription
Source: PubMed Central journal article supplement — Nucleic Acids Res. 2014 Oct 9;42(20):12455–68. doi: 10.1093/nar/gku925 (PMC4227773; doi:10.1093/nar/gku925), 2014-10-09
Supplement: supp_gku925_nar-01238-v-2014-File009.pdf [file supp_gku925_nar-01238-v-2014-File009.pdf]

## Supplementary Material

**Supplementary Table 1. A List of RT-qPCR Primers and siRNAs.**

| Primer/siRNA                | Sequence             | Reference |
|-----------------------------|----------------------|-----------|
| GAPDH-F                     | AGAAGGCTGGGGCTCATTG  | 27        |
| GAPDH-R                     | CTGTGGTCATGAGTCCTC   | 27        |
| CRTC1-F                     | CCAACCAGTCTCCACCTC   | This work |
| CRTC1-R                     | CGCCATCTGCTGCTCATAGT | This work |
| CRTC2-F                     | TGGATTTTTAGGGGTGAGG  | This work |
| CRTC2-R                     | CAAGTTCTGGTGGTTGAAGG | This work |
| CRTC3-F                     | GAAGCCACTGCCAAAACAAC | This work |
| CRTC3-R                     | CCACCTCCAACATCACAGG  | This work |
| pgRNA-F                     | GCCTTAGAGTCTCCTGAGCA | 7         |
| pgRNA-R                     | GAGGGAGTTCTTCTTAGG   | 7         |
| cccDNA-F                    | CTCCCCGTCTGTGCCTTCT  | 7         |
| cccDNA-R                    | GCCCCAAAGCCACCCAAG   | 7         |
| cccDNA-F (cell-free)        | GGAAAGAAGTCAGAAGGCAA | 25        |
| cccDNA-R (cell-free)        | GTGCCTTCTCATCTGCCGG  | 25        |
| siNC (non-specific control) | UUCUCCGAACGUGUCACGU  | 29        |
| siCRTC1-a                   | GAAAUCCCAGUACCUGCAA  | This work |
| siCRTC1-b                   | UCGCGCUGCACAAUCAGAA  | This work |

**Figure S1.** Overexpression of CRTC coactivators augmented HBV transcription. (A-C) Effect on preS1, C and CRE promoter activity. HepG2 cells were transfected with the indicated reporter (100 ng) and pcDNA3.1-V5/His-CRTC1/2/3 (100 ng). The differences between groups 1 and 3 are statistically significant by Student's t test. The P values are 0.0081 for A (highlighted with \*\*), 0.010 for B (highlighted with \*) and 0.000000013 for C (highlighted with \*\*\*).

**Figure S2.** Interaction between CRTC1 and CREB in HepG2 cells. (A) Association of CRTC1 with endogenous CREB. HepG2 cells were transfected with pcDNA3.1-V5/His-CRTC1. CRTC1 was precipitated with anti-V5. The precipitates and input lysates were analyzed by Western blotting. (B) Association of endogenous CRTC1 with CREB in HepG2.2.15 cells. Cells were lysed and immunoprecipitated with anti-CREB or IgG. The precipitates and input lysates were analyzed by Western blotting.

**Figure S3.** Association of CRTC1 S167A mutant with HBx. HepG2 cells were transfected with pcDNA3.1-V5/His-CRTC1 S167A and pCAGEN-Flag-HA-HBx. HBx was precipitated with anti-Flag. The precipitates and the input lysates were probed with mouse anti-Flag, mouse anti-V5 and rabbit anti-CREB.  $\alpha$ -tub:  $\alpha$ -tubulin.

**Figure S4.** Interaction of HBx with CRTC1 and CREB in HepG2 cells. HepG2 cells were transfected with plasmids expressing the indicated combinations of CRTC1, HBx and CRTC1 proteins. HBx was precipitated with anti-HA. The precipitates and input lysates were analyzed by Western blotting.

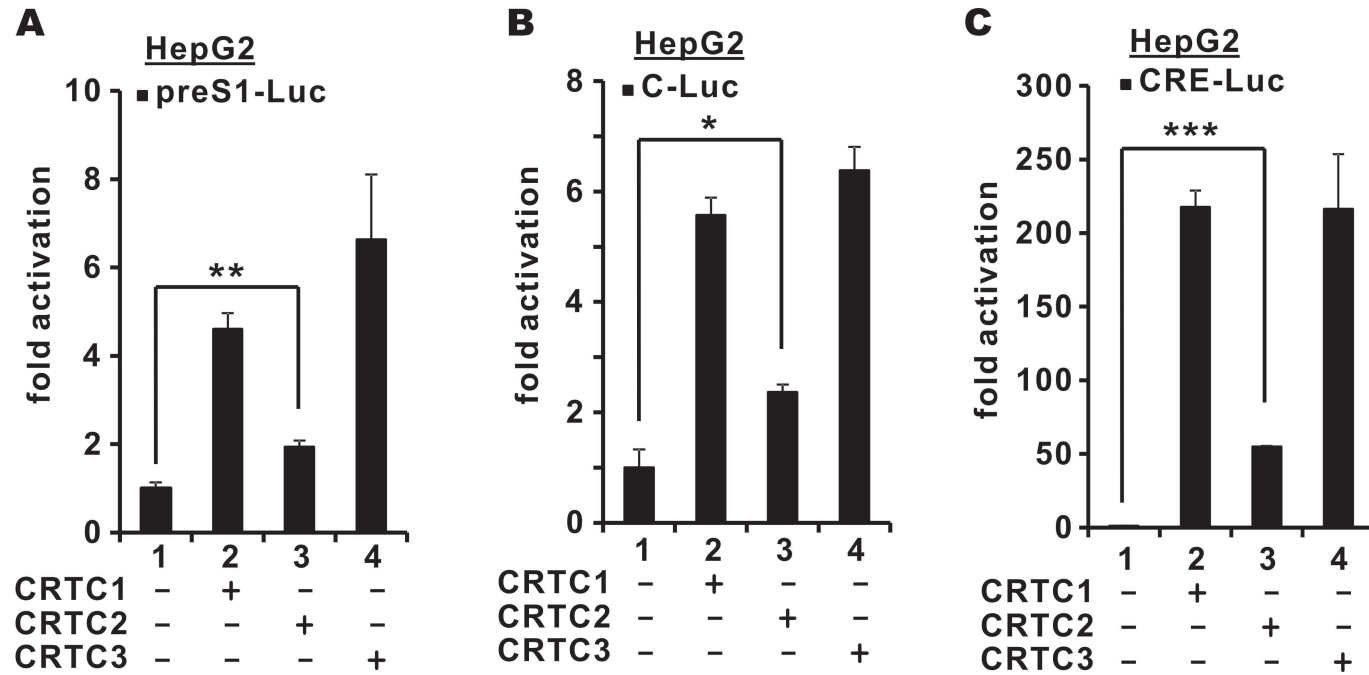

**Figure S1**

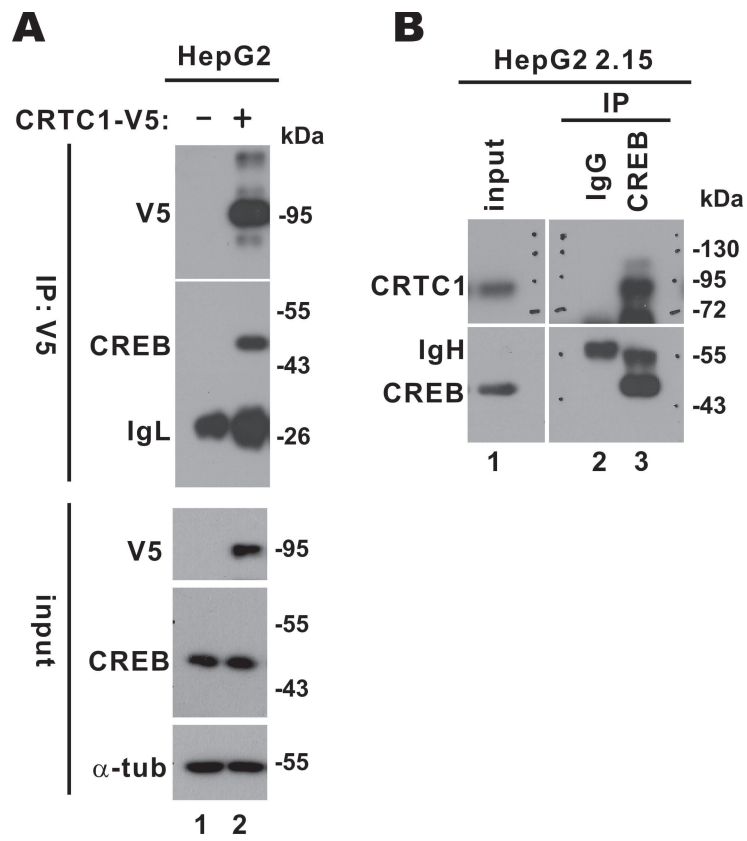

**Figure S2**

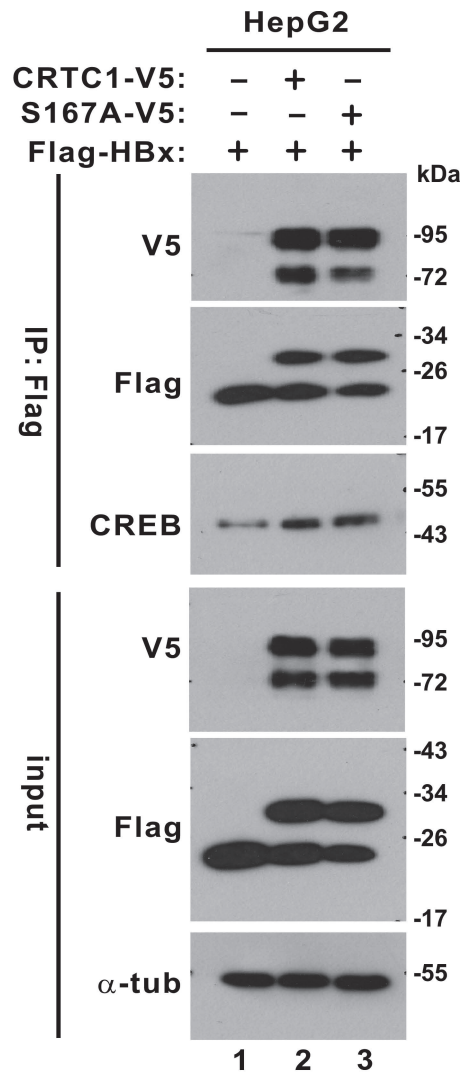

**Figure S3**

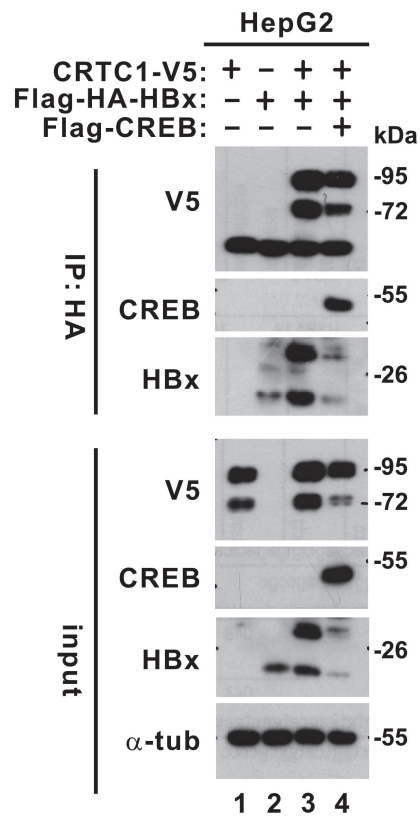

**Figure S4**
